# Supplementary material for: Control of protein trafficking by reversible masking of transport signals
Source: PubMed Central journal article supplement — Mol Biol Cell. 2016 Apr 15;27(8):1310–9. doi: 10.1091/mbc.E15-07-0472 (PMC4831884; doi:10.1091/mbc.e15-07-0472), 2016-04-15
Supplement: supp_E15-07-0472v1_E15-07-0472CombinedSupMats.pdf [file supp_E15-07-0472v1_E15-07-0472CombinedSupMats.pdf]

# Supplemental Materials

*Molecular Biology of the Cell*

Abraham et al.

SUPPLEMENTAL FIGURES

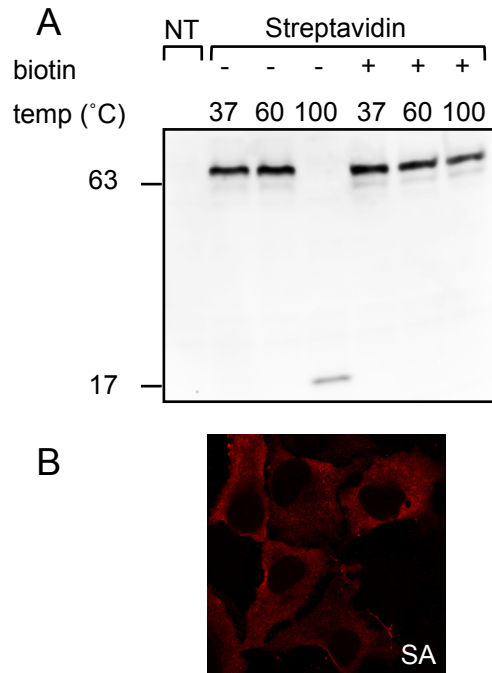

**Figure S1.** Expression of streptavidin in HeLa cells. (A) Western blot analysis using antibody that recognized both native and denatured SA (Abcam polyclonal, 1:5,000). Cell extracts were treated with SDS sample buffer with or without 1 mM biotin for 5 min at the indicated temperature. The observed 68 KD form represents the tetrameric form, which resists denaturation with the exception of heating at 100°C in the absence of biotin (Humbert *et al.*, 2005). (B) Indirect immunofluorescence microscopy of cells 24h after transfection with SA.

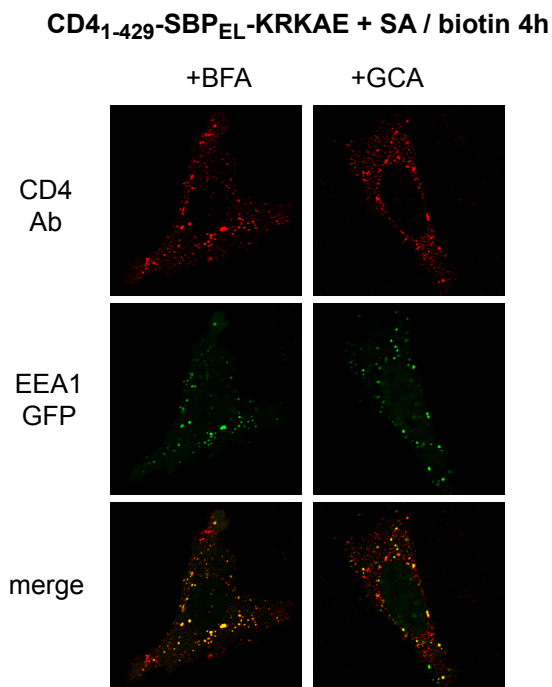

**Figure S2.** In the presence of BFA/GLA, biotin treatment induces redistribution of CD4<sub>1-429</sub>-SBP<sub>EL</sub>-KRKAE to a punctate pattern that resembles that of cotransfected EEA1-GFP. Conditions as in Figure 9C.

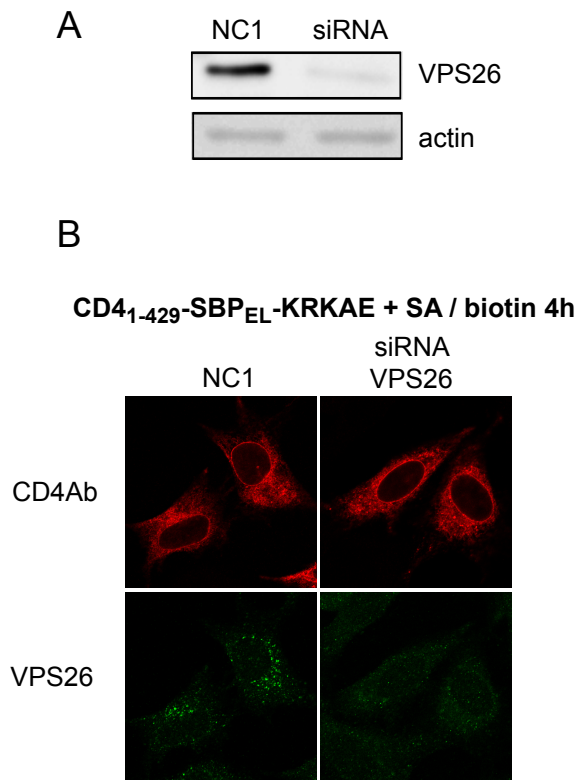

**Figure S3.** Knockdown of VPS26 has no effect on PM to ER transport of CD4<sub>1-429</sub>-SBP<sub>EL</sub>-KRKAE. The VPS26 siRNA was prepared according to Ref. (Du *et al.*, 2012). (A) Western blot analysis of the VPS26 siRNA effect 3 days after transfection. Scrambled siRNA NC1 was used as a control. Quantification of the bands indicated knockdown efficiency of 95%. (B) Cells were pretreated with or without siRNA for 2 days and were subsequently co-transfected with CD4<sub>1-429</sub>-SBP<sub>EL</sub>-KRKAE and SA; 24h later they were incubated for 4h with mouse anti-CD4 antibodies and biotin, then stained with anti-VPS26 antibodies followed by secondary antibodies.

## REFERENCES

- Du X, Kazim AS, Brown AJ, Yang H (2012). An essential role of Hrs/Vps27 in endosomal cholesterol trafficking. *Cell Rep* 1, 29-35.
- Humbert N, Zocchi A, Ward TR (2005). Electrophoretic behavior of streptavidin complexed to a biotinylated probe: a functional screening assay for biotin-binding proteins. *Electrophoresis* 26, 47-52.
